# Supplementary material for: Gene Expression Profiling of Biological Pathway Alterations by Radiation Exposure
Source: Hindawi journal article supplement (doi:10.1155/2014/834087), 2014-01-01

Supplement figure 1. PCA plot

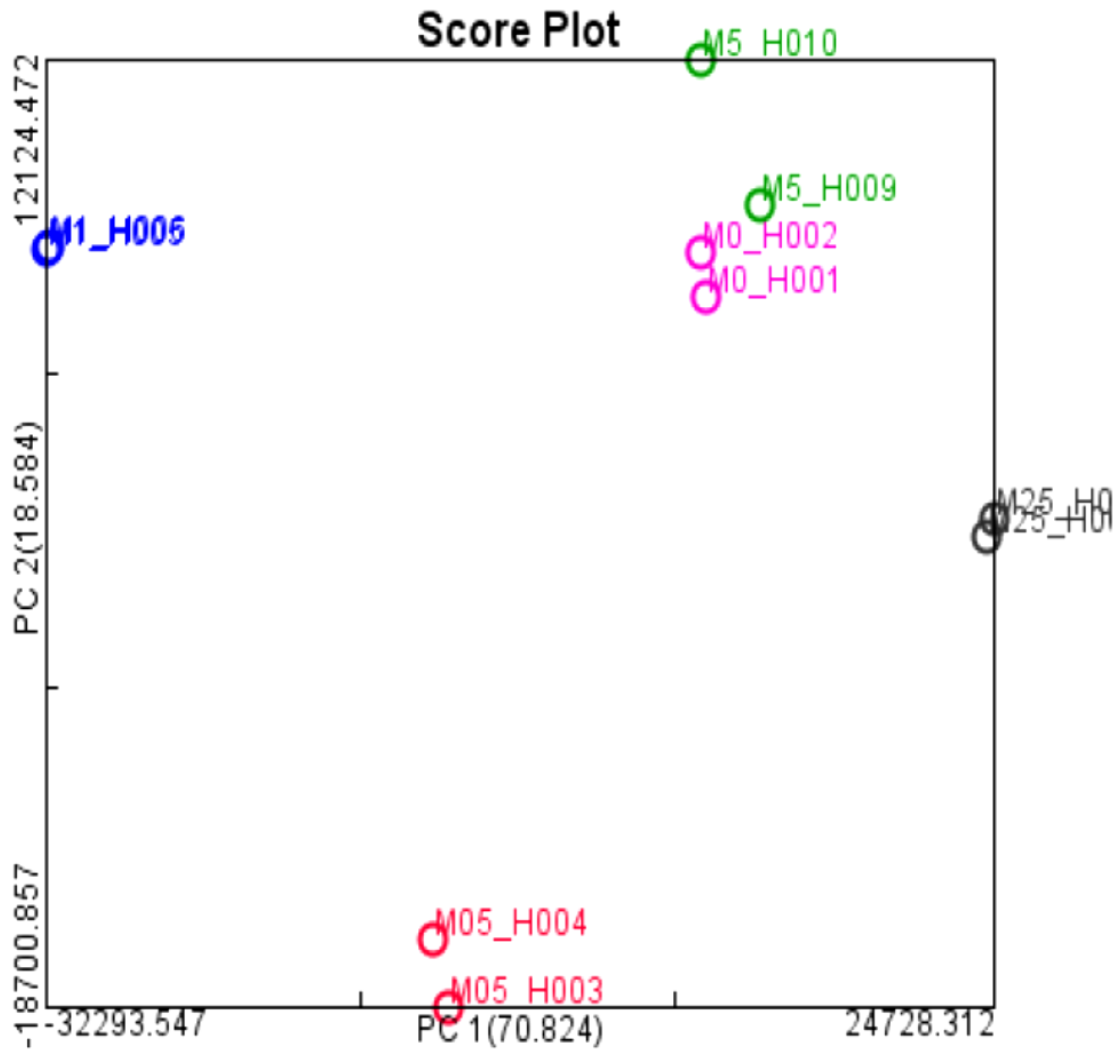

The variable of the first three principal components (PC1, PC2, PC3) for this study are 70.82%, 18.58% and 7.69% respectively. A subset of differential genes was selected for PCA analysis. An intensity filter was used to select genes where the difference between the maximum and minimum intensity values exceeds 400 among all microarrays. For this microarray project, the number of genes clustered was 238.

Supplement figure 2. Clustering analysis

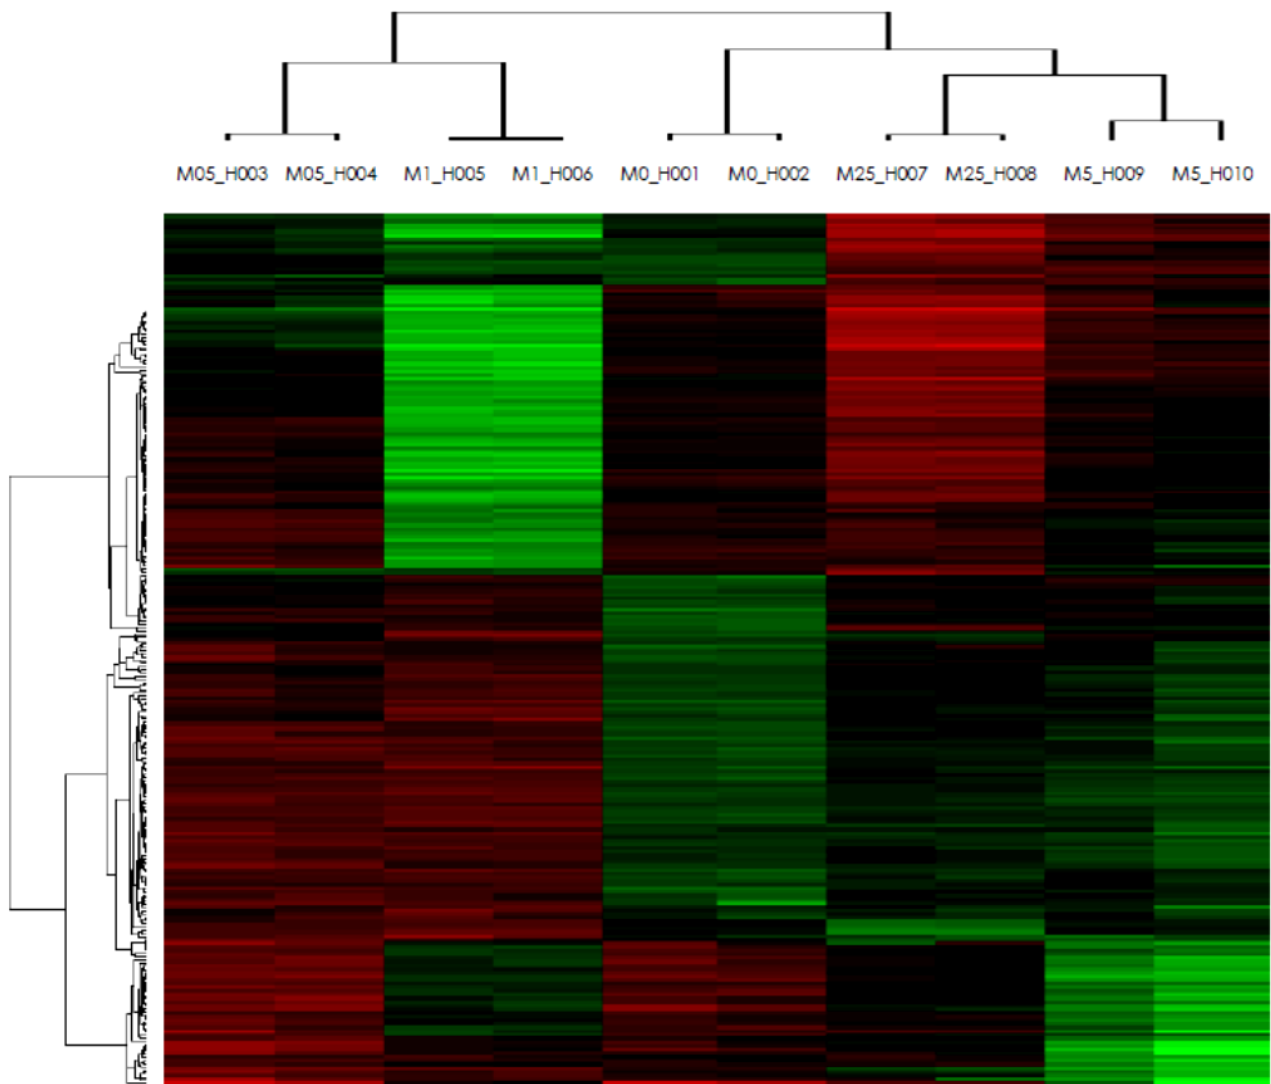

Clustering was performed to visualize the correlations among the replicates and varying sample conditions. Up- and down-regulated genes are represented in red and green colors, respectively. A subset of differential genes was selected for clustering analysis. An intensity filter was used to select genes where the difference between the maximum and minimum intensity values exceeds 400 among all microarrays. For this microarray project, the number of genes clustered was 238.

Supplementary Table 1.

| KEGG pathway       | ID       | C      | O       | E        | R      | rawP     | adjP     |
|--------------------|----------|--------|---------|----------|--------|----------|----------|
| Metabolic pathways | ID:01100 | 1130   | 48      | 18.16    | 2.64   | 1.55E-09 | 2.01E-07 |
| gene_symbol        | ACACB    | DNMT3A | SUCLG1  | POLR1A   | DGKA   | DAK      | OAT      |
|                    | PMM2     | GLUL   | ST3GAL4 | LTC4S    | BDH1   | PPCDC    | CTPS1    |
|                    | PTDSS2   | AHCY   | PCYT2   | SPTLC1   | TALDO1 | DLD      | ATP6V1E1 |
|                    | POLR1E   | GLYCTK | ACACA   | ATP6V1G1 | SMS    | GAPDH    | NDST2    |
|                    | C5orf4   | PNP    | SAT1    | AMD1     | IL4I1  | SCP2     | OGDH     |
|                    | PKM      | FUT4   | NDST1   | HPRT1    | ATP5G3 | KYNU     | COASY    |
|                    | IMPDH1   | ACAT1  | MDH1    | HMBS     | DHCR7  | BTD      |          |

C: the number of reference genes in the category

O: the number of genes in the gene set and also in the category

E: the expected number in the category

R: ratio of enrichment

rawP: p value from hypergeometric test

adjP: p value adjusted by the multiple test adjustment

Supplementary Table 2. Chromosomes containing the most number of differentially expressed genes categorized according to the varying doses of <sup>60</sup>Co radiation exposure.

| Chromosome | 0.5 Gy                            | 1 Gy                                                                                                                                                                                                                                               | 2.5 Gy                                            | 5 Gy |
|------------|-----------------------------------|----------------------------------------------------------------------------------------------------------------------------------------------------------------------------------------------------------------------------------------------------|---------------------------------------------------|------|
| 11         | None                              | AMICA1, MPEP1, DAK, LOC100128242, PPP2R5B, ETS1, TMEM179B, FAM111A, APLP2, ESAM, ST3GAL4, TMPRSS5, CASP1, RPS6KB2, VPS11, SIK3, OAF, DRAP1, THYN1, VPS37C, FADD, FUT4, CCDC86, MALAT1, LGALS12, CCDC85B, RARRES3, OVOL1, ACAT1, HMBS, ESRRA, DHCR7 | PSMA1,SPTY2D1 ,CD44, OR52M1, EIF4G2, HIPK3, NRIP3 | None |
| 17         | EVI2B <sup>a</sup> , CCDC47, LHX1 | EVI2B <sup>a</sup> , MIF4GD, GGNBP2, CSHL1, CD79B, SDF2, AZI1, SKAP1, GOSR1, HDAC5, ITGA2B, SPAG5, USP36, RPTOR, LRRC45, GALR2, MBTD1, ACBD4, SLC25A19, PLEKHM1, TUBG1, SLC38A10, CYGB, PCYT2, OSBPL7, RNF157, NKIRAS2, CSNK1D, ACACA              | No gene                                           | None |
| 19         | None                              | BRD4, PRKCSH, C19orf25, ILF3, MAP1S, GIPC1, ABHD8, ZNF44, RANBP3, SH3GL1, HOMER3, HAUS8, ZNF555, IZUMO4, LMNB2, NACC1, YIPF2, BST2, CCDC94, LPHN1, TNPO2, STK11, ILVBL, NR2F6, NMRK2,LONP1, GPX4, TLE2                                             | None                                              | None |

|    |      |                                                                                                                                                                    |                            |                                                                                                                                    |
|----|------|--------------------------------------------------------------------------------------------------------------------------------------------------------------------|----------------------------|------------------------------------------------------------------------------------------------------------------------------------|
| 16 | None | UNKL, ITGAL, NUDT16L1, NPRL3<br>, DECR2, CRYM, C16orf72, ZNF668, SEC14L5,<br>IGSF6, PMM2, RAB40C, YPEL3, HBQ1, SNRNP25,<br>ANKS3, ABCC6, HAGHL, PTX4, METRN, MLST8 | None                       | None                                                                                                                               |
| 2  | None | None                                                                                                                                                               | IL1R1, RANBP2 <sup>a</sup> | NEU4, RANBP2 <sup>a</sup> , CYTIP,<br>MCM6, CCNYL1,<br>CCL20, CYP20A1,<br>C2orf72, AGFG1, IL1A,<br>ICOS, NFE2L2, RNF103,<br>TCF7L1 |

---

<sup>a</sup>indicates that the gene is up-regulated under the exposure of two or more radiation dosage.

Supplement figure 3 protein-protein interaction network analysis. Genes expression associated with the cell's response to radiation-induced signaling pathway according to their corresponding gene ontologies.

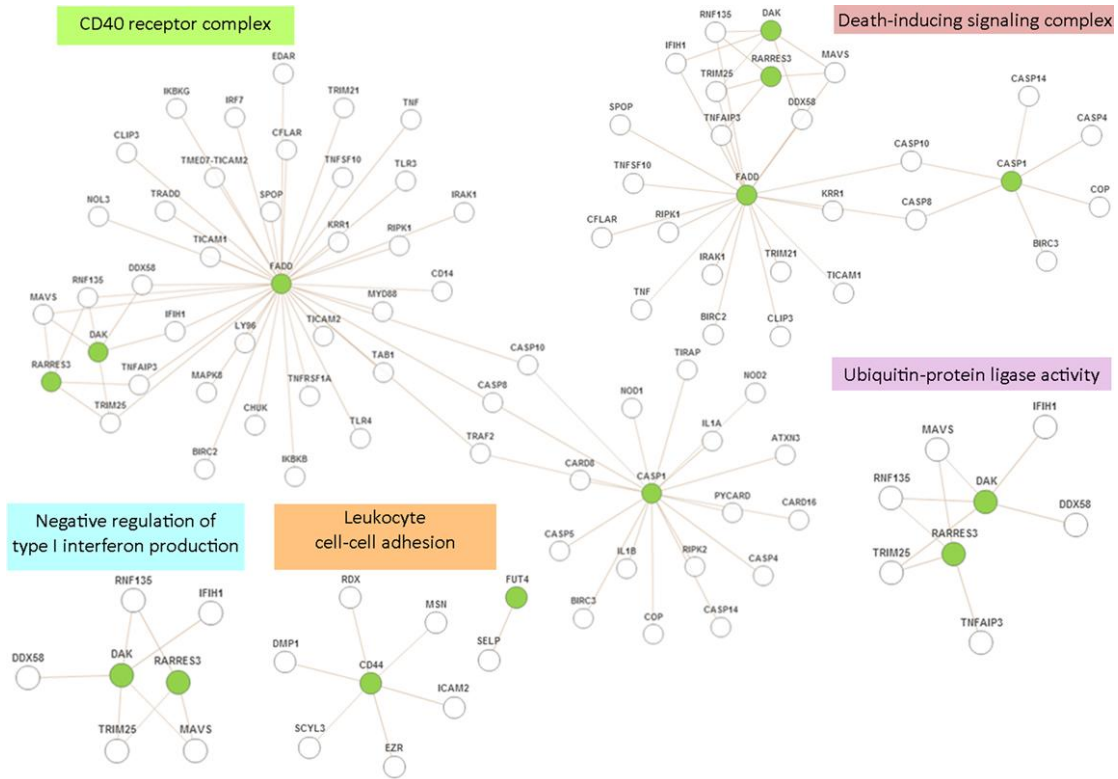

Supplement: f1 [file 834087.f1.pdf]
